1 Environmental surveillance for *Salmonella* Typhi as a tool to estimate the incidence of typhoid fever  
2 in low-income populations.

3

4 Christopher B. Uzzell<sup>1\*</sup>, Catherine M. Troman<sup>1</sup>, Jonathan Rigby<sup>2</sup>, Venkata Raghava Mohan<sup>3</sup>, Jacob  
5 John<sup>3</sup>, Dilip Abraham<sup>4</sup>, Rajan Srinivasan<sup>4</sup>, Satheesh Nair<sup>5</sup>, John Scott Meschke<sup>6</sup>, Nicola Elviss<sup>7</sup>,  
6 Gagandeep Kang<sup>4¶</sup>, Nicholas Feasey<sup>2,8¶</sup>, Nicholas C. Grassly<sup>1¶</sup>.

7

8 <sup>1</sup>Department of Infectious Disease Epidemiology, Imperial College London, London, UK

9 <sup>2</sup>Malawi-Liverpool Wellcome Trust Clinical Research Program, Blantyre, Malawi

10 <sup>3</sup>Department of Community Health, Christian Medical College, Vellore, India

11 <sup>4</sup>Division of Gastrointestinal Sciences, Christian Medical College, Vellore, India

12 <sup>5</sup>Gastrointestinal Bacteria Reference Unit, Public Health England, Colindale, London, UK

13 <sup>6</sup>Department of Environmental and Occupational Health Sciences, School of Public Health, University  
14 of Washington, Seattle, USA

15 <sup>7</sup>National Infection Service, Public Health England, London, UK

16 <sup>8</sup>Department of Clinical Sciences, Liverpool School of Tropical Medicine, Liverpool, UK

17

18 \*Corresponding author

19 E-mail: [cuzzell@ic.ac.uk](mailto:cuzzell@ic.ac.uk) (CU)

20

21 <sup>¶</sup>These authors contributed equally to this work

NOTE: This preprint reports new research that has not been certified by peer review and should not be used to guide clinical practice.

## 22 **Abstract**

23 **Background:** The World Health Organisation recommends prioritised use of recently prequalified  
24 typhoid conjugate vaccines in countries with the highest incidence of typhoid fever. However,  
25 representative typhoid surveillance data are lacking in many low-income countries because of the  
26 costs and challenges of diagnostic clinical microbiology. Environmental surveillance (ES) of  
27 *Salmonella* Typhi in sewage and wastewater using molecular methods may offer a low-cost  
28 alternative, but its performance in comparison with clinical surveillance has not been assessed.

29 **Methodology/Principal Findings:** We developed a harmonised protocol for typhoid ES and its  
30 implementation in communities in India and Malawi where it will be compared with findings from  
31 hospital-based surveillance for typhoid fever. The protocol includes methods for ES site selection  
32 based on geospatial analysis, grab and trap sample collection at sewage and wastewater sites, and  
33 laboratory methods for sample processing, concentration and quantitative PCR to detect *Salmonella*  
34 Typhi. The optimal locations for ES sites based on digital elevation models and mapping of sewage  
35 and river networks are described for each community and their suitability confirmed through field  
36 investigation. We will compare the prevalence and abundance of *Salmonella* Typhi in ES samples  
37 collected each month over a 12-month period to the incidence of blood culture confirmed typhoid  
38 estimated from cases recorded at referral hospitals serving the study areas and community surveys  
39 of healthcare seeking for individuals with fever.

40 **Significance:** If environmental detection of *Salmonella* Typhi correlates with the incidence of typhoid  
41 fever estimated through clinical surveillance, typhoid ES may be a powerful and low-cost tool to  
42 estimate the local burden of typhoid fever and support the introduction of typhoid conjugate  
43 vaccines. Typhoid ES could also allow the impact of vaccination to be assessed and rapidly identify  
44 circulation of drug resistant strains.

## 45 **Author Summary**

46 Typhoid fever is a bacterial enteric infection that remains a significant health burden to the  
47 6.4 billion people living in low- and middle-income countries. The WHO recently prequalified highly  
48 immunogenic typhoid conjugate vaccines (TCVs) and recommended that the introduction of public  
49 vaccination programmes should be based on an understanding of the local epidemiology of  
50 infection. However, representative data on the community level describing incidence of  
51 microbiologically confirmed typhoid cases are limited, reflecting the costs and challenges of  
52 implementing blood culture for *Salmonella* Typhi (*S. Typhi*). Therefore, cost-effective alternative  
53 means of community surveillance are required to assess overall burden of disease.

54 We developed a protocol for typhoid environmental surveillance, including methods for the  
55 identification of suitable sampling sites, sample collection and laboratory processing. The detection  
56 of *S. Typhi* in wastewater and sewage samples will be examined against the outcomes of hospital-  
57 based surveillance for typhoid fever with healthcare utilisation surveys to evaluate and validate the  
58 use of ES as an effective means of assessing community level incidence of typhoid. The findings of  
59 this study will inform potential wider implementation of ES for typhoid to support the introduction  
60 of TCVs and monitor their impact.

## 61 Introduction

62 Typhoid fever is caused by the human-restricted pathogen *Salmonella enterica* subspecies  
63 *enterica* serovar Typhi (*S. Typhi*). Recent estimates suggest that approximately 11 million new  
64 typhoid infections occur annually, resulting in approximately 117,000 deaths [1]. Incidence varies  
65 geographically with >90% of cases in south and southeast Asia and sub-Saharan Africa, where access  
66 to water, sanitation and hygiene (WASH) infrastructure is limited [2,3]. Typhoid is especially  
67 prevalent in urban, low socio-economic settings where overcrowding and unhygienic living  
68 conditions are common [4,5]. Incidence is typically lower in rural areas, although recent findings in  
69 rural or peri-urban sites describe a higher burden than previously appreciated [6,7]. Whilst  
70 increasing access to safe drinking water, improved sanitation and antibiotics have helped reduce the  
71 incidence of typhoid fever, its persistence in low-income countries and the emergence of antibiotic  
72 resistance, including extensively resistant (XDR) strains, are a major concern [8,9].

73 The isolation of *S. Typhi* by culture remains the gold standard method of detecting typhoid  
74 both in clinical practice and for the purposes of typhoid surveillance [10]. However, microbiological  
75 culture is time-consuming and resource intensive, and therefore has been difficult to sustain in low-  
76 and-middle-income countries (LMICs) where typhoid fever is endemic [11]. Consequently, the Widal  
77 test, based on seroconversion to surface (O) and flagellin (H) antigens, is still commonly used to  
78 diagnose typhoid, despite its low sensitivity and specificity [12,13]. Currently there are no point-of-  
79 care diagnostics that are sufficiently accurate to replace blood culture [14].

80 By the end of 2020, two Typhoid Conjugate Vaccines (TCV) had been prequalified by the  
81 World Health Organisation (WHO) and recommended for use to control typhoid fever with their  
82 introduction prioritised in countries with the highest incidence of typhoid disease or a high  
83 prevalence of antimicrobial resistant *S. Typhi* [15]. However, limited surveillance capacity means that  
84 there is a shortage of reliable country-specific data on the burden of typhoid fever in LMICs.  
85 Therefore, alternative strategies are required to better understand the incidence and epidemiology

86 of typhoid fever in resource poor areas, to inform future TCV roll-out and its likely cost-effectiveness  
87 [16]. One alternative to blood culture based febrile illness surveillance is to undertake environmental  
88 surveillance (ES) whereby pathogens circulating in a population are monitored by testing  
89 environmental samples (sewage and wastewater) for their presence. ES is dependent on detecting  
90 disease-causing microbiological agents shed into the environment through urine or faeces regardless  
91 of the clinical manifestations experienced by the patient. The primary advantage of ES is its relatively  
92 low cost and potential for high sensitivity, given the aggregation of faecal material from a large  
93 population sample. As a result, it is capable of detecting community-wide subclinical (*i.e.* “silent”)  
94 disease transmission [17] which contributes to maintenance of *S. Typhi* in the human population.

95 In recent years, ES has been used to support the Global Poliovirus Eradication Initiative  
96 [18,19]. This has stimulated interest in the expanded application of ES for diverse pathogens  
97 including *S. Typhi* and more recently SARS-CoV-2 as a complementary approach to clinical and  
98 diagnostic surveillance [20,21]. Detection of *S. Typhi* in environmental samples has recently been  
99 used to investigate community transmission dynamics and risk factors for typhoid fever in  
100 Bangladesh [22], Nepal [23], Democratic Republic of Congo [24] and Nigeria [25]. Retrospective  
101 analysis of environmental samples following identified outbreaks of typhoid may provide valuable  
102 information regarding the scale and likely source of the infection [26]. Moreover, it has been  
103 postulated that prospective ES could be used to evaluate the impact of TCV introduction in the  
104 absence or in addition to blood culture surveillance and as a cost-effective approach to guide catch-  
105 up TCV vaccination programs [27]. However, the relationship between environmental detection and  
106 disease incidence remains unclear as few studies have sought to conduct typhoid ES in communities  
107 with ongoing surveillance for typhoid cases.

108 Here we describe a systematic approach to the design and implementation of typhoid ES,  
109 which will begin in India and Malawi in 2021. The performance of ES will be evaluated through  
110 comparison of the prevalence and quantity of *S. Typhi* detected in ES samples with typhoid fever

111 incidence inferred from the number of culture-confirmed typhoid cases at local hospitals and health  
112 care utilisation surveys. This will indicate the utility of typhoid ES as an affordable tool to determine  
113 the incidence of typhoid fever in the community, and the need for vaccination and WASH  
114 interventions. We describe the study design for assessing the performance of typhoid ES; develop a  
115 protocol for the identification of suitable ES site locations using a remote, geographic information  
116 systems (GIS) based framework and local demographic data; outline field-based sample collection,  
117 handling, and processing protocols; and describe the laboratory methods for direct detection of *S.*  
118 Typhi in ES grab and trap samples.

## 119 **Methods**

### 120 **Study design**

121           The locations for this study will be the central area of Vellore, India and the city of Blantyre,  
122 Malawi. Study boundaries are defined as those areas covered by hospital-based blood culture  
123 surveillance and planned healthcare utilisation surveys. In Vellore, this corresponds to the study area  
124 originally identified by the Surveillance of Enteric Fever in India (SEFI) program [28] and represents  
125 an area of 16 km<sup>2</sup>. In Blantyre, this includes the entire municipality, consisting of the central urban  
126 districts and surrounding areas, representing 214 km<sup>2</sup>. We will compare the prevalence and  
127 abundance of *S. Typhi* in ES samples between these study locations and within locations over time  
128 and space during a 12-month period. We will also assess the association between the prevalence  
129 and abundance of *S. Typhi* in ES samples and the incidence of culture-confirmed typhoid fever cases  
130 in ES site catchment populations as reported at local hospitals.

131           The estimated incidence of typhoid fever among children in Vellore during 2017-2020 was  
132 about twice that for Blantyre during a similar time period 2016-2018 (approximately 2% vs 1% per  
133 year of observation for children <15 years old) [29]. Pilot ES surveillance data from Vellore based on  
134 direct molecular detection methods using either grab samples (bag-mediated filtration) or trap  
135 samples (Moore swabs), detected *S. Typhi* in 14% of all samples. Similar data are not yet available  
136 from Blantyre. If typhoid ES is to give a reasonable indication of the incidence of typhoid fever, we  
137 might expect the prevalence of *S. Typhi* in ES samples in Blantyre to be about half that observed in  
138 Vellore (*i.e.* 5-7% vs 14%). To detect this difference in proportions with 80% power we would need  
139 to sample between 26 and 47 ES sites with monthly sample collection in each location, using a  
140 mixed-effects logistic regression model to allow for clustering of detection by site (the intraclass  
141 correlation coefficient in Vellore was 0.08 for the pilot data) [30]. We therefore decided to select 40  
142 ES sites at each location and to sample every month. We will also compare the detection (yes/no)  
143 and abundance (genome copies) of *S. Typhi* at each site over time with the incidence of typhoid

144 fever in the associated catchment populations using mixed-effects logistic and linear regression  
145 models, respectively. We did not conduct formal power calculations for these analyses because of  
146 uncertainty in underlying effect sizes and variance in study measurements.

#### 147 **ES site selection**

148 The two study locations used for this project are not served by formal, centralised  
149 wastewater networks. Instead, waste material and sewage are deposited and transported via either  
150 an artificial open above-ground shallow drainage network (Vellore), or an urban freshwater river  
151 system that is contaminated directly or through emptying of the contents of pit latrines (Blantyre).  
152 Digital geospatially referenced datasets representing the spatial distribution of the wastewater  
153 networks were used for the ES site selection process. Within a GIS-based framework, all wastewater  
154 confluence points (*i.e.* locations where 2 or more channels converge) present throughout the full  
155 extent of the 2 study areas were automatically identified and geographic coordinates were  
156 calculated and stored. Results were manually checked, and all duplicate or erroneous records were  
157 removed. The remaining locations represented the initial list of potential candidate ES sites for each  
158 study site.

159 Freely available elevation data (Advanced Land Observing Satellite Digital Elevation Model  
160 (DEM) 12.5 m resolution) was obtained for each study area from the Alaska Satellite Facility (ASF)  
161 Distributed Active Archive Center (DAAC). Using the standardised AGREE watershed delineation  
162 approach [31,32], whereby the DEMs are hydrologically reconditioned using the geospatially  
163 referenced network shapefiles (*i.e.* flow enforcement via stream burning), new topographic datasets  
164 were created and used to generate geographical catchment areas for each candidate ES site  
165 location. Candidate ES locations that generated catchments which did not capture areas contained  
166 within the study area boundaries were removed. Of those retained, a duplicate set of 'digitally  
167 clipped' catchments were produced whereby the full extents were geospatially intersected with the  
168 specific study area boundaries. Depending on data availability, the WorldPop [33] or High-Resolution



169 Settlement Layer (HRSL) [34] datasets were used to estimate catchment populations and calculate  
170 population density estimates for both the full catchments and those spatially clipped to the study  
171 areas. Digital land use and human population datasets indicated key differences in the  
172 environmental composition between the two study areas. Specifically, Vellore consists exclusively of  
173 medium to high population density urban environments, whilst the larger Blantyre study site  
174 exhibits a variety of land use types, including agricultural lands, natural grassland and forested areas  
175 in addition to both peri-urban and urban areas characterised by a wide range of residential settings  
176 (*e.g.* informal, traditional and permanent dwellings). To harmonise the study design and improve  
177 consistency and comparability between the 2 locations, we only retained those candidate ES sites  
178 throughout the Blantyre study area that produced catchments consisting mostly of medium and high  
179 population density urban areas. All other ES sites which did not meet this requirement were deleted.

180 Each study area was divided into an array of equal size rectangular cells (*i.e.* fishnet) used to  
181 generate a sampling grid. Due to the differences in areal extents between the two study areas,  
182 different size grid networks were selected to ensure appropriate resolution for each location: 500 m  
183 and 75 m for Blantyre and Vellore, respectively. The number of candidate ES sites per grid cell was  
184 calculated and for each sample cell that contained multiple potential ES locations the downstream  
185 site was retained whilst all others were deleted. However, if two or more ES sites in the same grid  
186 cell were situated on different river streams or drainage network channels, therefore generating  
187 independent catchments, then both/all were retained.

188 Finally, to ensure that the finalised list of ES sites for each location represented a wide range  
189 of catchment sizes, candidate ES sites were stratified by catchment population estimates and  
190 categorised into 3 approximately equal size groups (terciles) representing small, medium and large  
191 catchment populations. In order to maximise detection sensitivity, ES sites with the greatest  
192 population density estimates for each catchment size category were identified and retained as  
193 priority ES sites. Once finalised, the full lists of priority candidate ES sites were visited by field-based

194 teams to undertake detailed site descriptions and assess their overall suitability for inclusion in the  
195 study based on accessibility, perceived quality of sampling location (*e.g.* adequate depth and flow of  
196 wastewater) and personnel safety concerns. Sites that were deemed unsuitable were removed. Of  
197 the suitable locations, a total of 40 sites for each study area were confirmed as the project ES sites.  
198 Where available, previously obtained data during initial pilot studies were used to help guide the  
199 decision-making process. During this iterative review, it was considered important to retain broad  
200 spatial coverage throughout both study areas and maintain a wide distribution of catchment sizes as  
201 determined by population estimates.

## 202 **ES sample collection**

203           Following the recommendations of the BMGF Typhoid Environmental Surveillance Expert  
204 Advisory Committee (EAC), wastewater/sewage samples will be collected using two separate  
205 collection procedures: trap sampling using Moore swabs (*i.e.* gauze pad) and grab samples with  
206 membrane filtration. Moore swabs made of hospital gauze will be prepared following the protocol  
207 described by Sikorski and Levine [35]. At field ES sites, swabs will be fixed in place using wire or  
208 twine tied to a fixed object or stone and suspended in flowing wastewater or sewage for 48-72  
209 hours. Upon retrieval, Moore swabs, including their attachment line, will be placed in containers  
210 containing 450 ml of Universal Pre-Enrichment (UPE) broth (BD Difco, Fisher Scientific) [36]. For the  
211 grab samples, wastewater/sewage samples will be collected using standard sample collection  
212 equipment (*e.g.* bucket and rope, long handled dipper or similar) used to fill a 1 litre container. Once  
213 collected, all sample containers (Moore swab and grab samples) will be disinfected externally and  
214 placed in an ice box for immediate return to the laboratory within 4 hours of retrieval. Sample  
215 containers will be labelled with sample ID, date, sample type (*e.g.* sewage or wastewater) and initials  
216 of personnel collecting the sample. All other sampling equipment will be wiped down with  
217 disinfectant. Suitable personal protection equipment (PPE) (including gloves, lab coat, glasses, and  
218 face mask) will be donned upon arrival at the sampling site and GPS coordinates will be recorded

219 using handheld GPS device. Each quarter, wastewater physicochemical properties will also be  
220 measured at the site (including temperature, pH, oxidative reduction potential (ORP), dissolved  
221 oxygen, total suspended solids (TDS), salinity and turbidity) using a water quality probe following a  
222 published protocol [17]. At the first visit field staff will also collect information on local infrastructure  
223 and ES site characteristics using an electronic questionnaire.

## 224 **Blood culture surveillance**

225 Information on the number, age, and place of residence for blood culture confirmed typhoid  
226 cases recorded at hospitals serving the study communities during the study period will be extracted  
227 from the electronic records. In Vellore, the Christian Medical College (CMC) hospital, a 1,721 bed  
228 tertiary care centre, and its two satellite facilities, the Low Cost Effective Care Unit and the CHAD  
229 hospital, serve the study area along with the government-run Pentland Hospital. We will use health  
230 seeking survey instruments to determine the probability that a typhoid case seeks care at one of  
231 these participating hospitals. Age-appropriate blood volumes (3 ml in <1 year; 5 ml in 1 to 15 years; 8  
232 to 10 ml >15 years) will be obtained from those hospitalised with an acute febrile illness and culture  
233 for *S. Typhi* done using the automated BacT/ALERT system (bioMérieux, France) at the CMC Vellore  
234 microbiology department.

235 In Blantyre, the Queen Elizabeth Central Hospital (QECH) serves the study area and  
236 surrounding districts. Blood will be sampled from paediatric patients presenting with non-specific  
237 febrile illness, who test negative for malaria, are severely ill with suspected sepsis, or fail initial  
238 malaria treatment and remain febrile, and from all febrile adult patients admitted. 2-4 mL of blood  
239 will be taken for culture from children (aged younger than 16 years) and 7-10 mls from adults under  
240 aseptic conditions. All blood samples will be cultured using the automated BacT/ALERT system  
241 (bioMérieux, France).

242 Bottles that flag as positive after incubation will have Gram stain done and Gram-negative  
243 bacilli will be identified using API biochemical testing (bioMérieux, France). *Salmonellae*, including *S.*

244 Typhi will be typed using agglutination with serotype-specific antisera according to the White-  
245 Kauffman-Le Minor scheme [37].

## 246 **ES laboratory methods**

247 On arrival at the laboratory, Moore swabs will be incubated at 37°C for 24 hours in the  
248 containers of UPE to enrich bacteria trapped in the swab. 40 ml will be filtered in two aliquots of 20  
249 ml under a vacuum and the filter discs cut into strips and stored at -20°C until DNA extraction. Grab  
250 samples for membrane filtration will be pre-filtered using a coffee filter, then filtered under a  
251 vacuum using up to five filter discs (0.45 µm) which will then be eluted using 10 ml Ringers lactate  
252 solution. 1 ml of the Ringers lactate solution will then be centrifuged, and the resulting pellet stored  
253 at -20°C until DNA extraction. These methods have shown to work adequately for processing Moore  
254 swabs and grab samples and for downstream detection of *S. Typhi* [36].

255 DNA extraction will be carried out using the QIAamp PowerFecal Pro kit (Qiagen) following  
256 the manufacturer's protocol, eluted into 50 µl, and stored at -20°C. A commercially available spike-in  
257 control will be used to assess success of DNA extraction and PCR inhibition (qPCR DNA Extraction  
258 and Inhibition Control, Eurogentec). The quantitative (q)PCR targets three genes in the *S. Typhi*  
259 genome: *staG*, *ttr*, and *tviB*. Of these, *staG* and *tviB* in combination have been shown to detect *S.*  
260 *Typhi* [38,39], whilst *ttr* should give a positive result for all *Salmonella* species [38]. Primers and  
261 probes targeting HF183, a frequently used marker gene derived from *Bacteroides* 16S rRNA, have  
262 been selected for use as a positive control to detect human faecal contamination of the samples  
263 [40]. Primer and probe sequences to be used in this study are detailed in Table 1.

264 **Table 1. Sequences for the primers and probes to be used in this study.** Fluorescent dyes and  
 265 quenchers on the probes are in bold.

| Target | Primer/probe name | Sequence (5'-3')                                                 | Reference |
|--------|-------------------|------------------------------------------------------------------|-----------|
| staG   | staG_F            | CGC GAA GTC AGA GTC GAC ATA G                                    | [39]      |
|        | staG_R            | AAG ACC TCA ACG CCG ATC AC                                       |           |
|        | staG_P            | <b>[TAMRA]</b> -CA TTT GTT CTG GAG CAG GCT GAC GG- <b>[BHQ2]</b> |           |
| tviB   | tviB_F            | TGT GGT AAA GGA ACT CGG TAA A                                    | [38]      |
|        | tviB_R            | GAC TTC CGA TAC CGG GAT AAT G                                    |           |
|        | tviB_P            | <b>[JOE]</b> -TG GAT GCC GAA GAG GTA AGA CGA GA- <b>[BHQ1]</b>   |           |
| ttr    | ttr_F             | CTC ACC AGG AGA TTA CAA CAT GG                                   | [38]      |
|        | ttr_R             | AGC TCA GAC CAA AAG TGA CCA TC                                   |           |
|        | ttr_P             | <b>[FAM]</b> -CA CCG ACG GCG AGA CCG ACT TT- <b>[BHQ1]</b>       |           |
| HF183  | HF183_F           | ATC ATG AGT TCA CAT GTC CG                                       | [40]      |
|        | HF183_R           | CTT CCT CTC AGA ACC CCT ATC C                                    |           |
|        | HF183_P           | <b>[FAM]</b> -CT AAT GGA ACG CAT CCC- <b>[BHQ1]</b>              |           |

266

267 Reactions can be carried out in a multiplex or as single reactions and will be carried out in a  
 268 final volume of 25 µl using a qPCR mastermix with a ROX reference dye for normalisation (multiple  
 269 mixes will be evaluated). Primers and probes will be included at a final concentration of 0.5µM and  
 270 0.1µM respectively for *tviB*, *staG* and HF183, and *ttr* primers and probe at 0.25µM and 0.5µM.  
 271 Cycling conditions for all qPCR reactions will be as follows: 50°C for 2 minutes then 95°C for 15  
 272 minutes followed by 40 cycles of 95°C for 30s, 60°C for 30s and 72°C for 30s. The Ct values for each  
 273 gene target will be assessed to decide whether a sample is positive for *S. Typhi*. A standard curve for  
 274 each target will be produced by running a qPCR on a dilution series of gBlocks Gene Fragment DNA  
 275 standards (IDT) in water.

## 276 **Statistical analysis**

277 We will compare the prevalence of *S. Typhi* in ES samples between Vellore and Blantyre  
 278 using a mixed-effects logistic regression model with a random effect on the intercept by ES site to  
 279 allow for repeated measures. In each location, mixed-effects logistic regression and binomial  
 280 regression will be used to investigate the association of *S. Typhi* detection with ES site characteristics

281 including the physicochemical properties of the wastewater/sewage, local infrastructure, climate  
282 variables, catchment population size and characteristics, including the number of blood culture  
283 confirmed typhoid cases among residents within the catchment area. We will also conduct  
284 exploratory analyses of the spatial distribution of *S. Typhi* detection, looking for hotspots for  
285 transmission and their association with local population characteristics.

## 286 Results

### 287 Site Selection

288 The geographic distribution of both candidate and field-based confirmed ES sites for the  
289 Blantyre and Vellore study areas is shown in Fig 1A and Fig 1B, respectively, and summary statistics  
290 for both the full and spatially intersected catchments are presented in Table 2. Full details can be  
291 found in the supplementary material (S1 Table) For Blantyre, an initial list of 93 unique priority  
292 candidate locations were identified using the GIS-based site selection approach. Candidate ES sites  
293 were relatively well distributed throughout the study area; however, the majority were located  
294 throughout the northern and eastern quarters of Blantyre, consistent with the distribution of  
295 densely populated areas served by the Mudi and Lukhubula rivers which drain to the southwest and  
296 northwest, respectively. Hydrological modelling indicates that catchments for candidate ES site  
297 ranged from approx. 0.1 km<sup>2</sup> to 21.2 km<sup>2</sup> (mean: 5.1 km<sup>2</sup>). Moreover, catchment population  
298 estimates varied between approx. 400 to over 107,000, stratified into 3 equal number groups  
299 (terciles; n31): small <9,000; medium 9,000 – 35,000; and large >35,000. Mean population density  
300 for all 93 catchments was 8,161 inhabitants/km<sup>2</sup> (range: 3,550 – 30,268 inhabitants/km<sup>2</sup>), remaining  
301 relatively consistent between the population stratified groups with estimates of 9,086  
302 inhabitants/km<sup>2</sup>, 8,056 inhabitants/km<sup>2</sup> and 7,340 inhabitants/km<sup>2</sup> for the small, medium and large  
303 population terciles, respectively. Most of the ES sites catchments overlapped with the study area,  
304 such that the mean extent and population of the full catchments and those clipped to the study area  
305 were similar.

306

307 **Fig 1. Geographic distribution of ES sites for Blantyre, Malawi (A) and Vellore, India (B).** Candidate  
308 and confirmed ES sites are shown as grey and red dots, respectively. Blue lines represent the spatial  
309 distribution of wastewater networks. Maps were plotted using QGIS 3.10 using base map tiles

310 sourced from CartoDB (using data by OpenStreetMap made available under the Creative Commons  
 311 Attribution (CC BY) 4.0 license).

312

313 **Table 2. Summary area and population statistics for ES catchments by tercile in Blantyre and**  
 314 **Vellore for the full catchments and those overlapping the study area.**

| <b>Blantyre</b>                        |                        |                            |                              |                                        |                            |                              |
|----------------------------------------|------------------------|----------------------------|------------------------------|----------------------------------------|----------------------------|------------------------------|
|                                        | Full catchments        |                            |                              | Catchments intersecting the study area |                            |                              |
|                                        | Small                  | Medium                     | Large                        | Small                                  | Medium                     | Large                        |
| N                                      | 31                     | 31                         | 31                           | 31                                     | 31                         | 31                           |
| Mean Population (range)                | 4,998<br>(381 - 8,246) | 17,164<br>(9,109 - 31,255) | 72,707<br>(38,438 - 107,606) | 4,878<br>(381 - 8,062)                 | 16,813<br>(8,180 - 30,477) | 70,419<br>(38,002 - 106,902) |
| Mean Catchment Area (km <sup>2</sup> ) | 0.68                   | 2.65                       | 12.26                        | 0.65                                   | 2.11                       | 11.93                        |
| <b>Vellore</b>                         |                        |                            |                              |                                        |                            |                              |
|                                        | Full catchments        |                            |                              | Catchments intersecting the study area |                            |                              |
|                                        | Small                  | Medium                     | Large                        | Small                                  | Medium                     | Large                        |
| N                                      | 33                     | 33                         | 32                           | 33                                     | 33                         | 32                           |
| Mean Population (range)                | 553<br>(36 - 1,239)    | 7,520<br>(1,442 - 21,917)  | 95,127<br>(22,561 - 286,324) | 480<br>(13 - 1,239)                    | 2,445<br>(63 - 7,140)      | 26,117<br>(3,379 - 111,754)  |
| Mean Catchment Area (km <sup>2</sup> ) | 0.09                   | 1.65                       | 69.44                        | 0.05                                   | 0.41                       | 4.37                         |

315

316

317 For Vellore, a total of 98 candidate ES site locations were initially identified. The bulk of the  
 318 sites were located within the study boundary and spatially consistent with those areas better served  
 319 by the artificial open drainage sewer network. Overall, the mean area for the full unprocessed  
 320 catchments was 22.5 km<sup>2</sup>, however, this masks significant variability and a highly skewed  
 321 distribution of catchment sizes ranging from <1 km<sup>2</sup> to 175 km<sup>2</sup> (median 0.81 km<sup>2</sup>) with many



322 catchments extending well beyond the study boundary. Similarly, catchment population estimates  
323 varied considerably from <50 to over 280,000. Using the tercile stratification, small medium and  
324 large class catchments were based on approximate population thresholds of <1,300, 1,300 – 22,000  
325 and >22,000, respectively. Catchment extent and population metrics were significantly altered when  
326 using the processed catchments that spatially intersected with the study boundary. Using these  
327 data, the maximum catchment size was 15.6 km<sup>2</sup> (approx. 94% of the study area), representing an  
328 estimated population of approximately 111,750. Moreover, mean population density estimates  
329 using the cropped catchment extents remained relatively consistent, ranging from 6,863  
330 inhabitants/km<sup>2</sup> to 5,534 inhabitants/km<sup>2</sup> for small and large category catchments, respectively.  
331 These refinements were not required for Blantyre as the entire urban area was selected as described  
332 above.

333 Candidate ES site locations underwent a significant review process and following field-based  
334 site investigations and detailed discussions between study partners in each study location, the  
335 proposed lists of candidate sites were used to identify and confirm the 40 ES sites to be retained for  
336 the study. ES sites confirmed for inclusion in the study are presented in Fig 1a and Fig 1b.

## 337 Discussion

338 The support for widespread TCV introduction by the WHO Strategic Advisory Group of  
339 Experts (SAGE) on immunisation [41] and approval of funding by Gavi offer hope in the fight to  
340 reduce morbidity and mortality from typhoid fever. Introduction of TCV into a country's vaccine  
341 schedule should be informed by country-specific data on the baseline burden of typhoid. However,  
342 these data are typically lacking because of limited implementation of hospital-based blood culture  
343 surveillance or of community-based surveillance for acute febrile illness. Moreover, these  
344 surveillance methods may lack sensitivity in communities with a high uptake of effective antibiotics  
345 or where formal healthcare is not always sought. ES may therefore offer a low-cost, sensitive  
346 alternative or supplement to clinical surveillance, providing critical information on the burden of  
347 typhoid that will support TCV introduction [42]. However, few studies have investigated typhoid ES  
348 and therefore, uncertainties regarding how best to effectively design and implement such a  
349 surveillance strategy remain.

350 To address these gaps, we describe the design of a study to detect *S. Typhi* in environmental  
351 samples and correlate these findings with contemporaneous hospital-based blood culture  
352 surveillance serving the same communities over a 12-month period. This will provide timely  
353 information to help ascertain the technical feasibility and reproducibility of typhoid ES and its utility  
354 in determining the local incidence of typhoid fever. It will also inform our understanding of the  
355 spatiotemporal patterns of *S. Typhi* transmission within the community and the optimal ES site  
356 characteristics for *S. Typhi* detection.

357 The relatively low cost and scalability of ES means it can also be expanded to cover large  
358 geographic areas that include a range of settings (*i.e.* rural, urban and peri-urban) therefore allowing  
359 decision-makers to better understand the epidemiology of infection and develop and deploy an  
360 optimum region-specific vaccination programme. Specifically, such information could allow for the  
361 more appropriate distribution of TCV relative to the spatial burden of typhoid fever. ES could also be

362 deployed in the event of a suspected outbreak of typhoid fever and used to locate high risk areas for  
363 targeted vaccination. Finally, ES may also be valuable in evaluating the impact of TCV following its  
364 roll out by monitoring potential reductions in *S. Typhi* prevalence or abundance in environmental  
365 samples.

366 In preparing the current study protocol, several important considerations were made.  
367 Firstly, we develop a representative site selection strategy that ensures the findings of the ES can be  
368 effectively compared with the incidence of typhoid fever estimated from healthcare utilisation  
369 surveys and the number of cases reported by local hospitals serving the community. Secondly, the  
370 study design sought to maximise the comparability of results between countries by standardising the  
371 methodological approach. Thirdly, we aimed to generate an easily reproducible approach to be  
372 adopted as a standardised procedure for future studies. This was particularly important as we plan  
373 to expand the proposed study to include a third study site in the Asante Akim North district, Ghana.

374 We believe that the design of this prospective study has several strengths. First, we  
375 anticipate that the inclusion of two distinct, yet comparable study sites characterised by differing  
376 environmental conditions will provide an opportunity to elucidate potential differences or  
377 similarities in the distribution and abundance of *S. Typhi* and performance of ES between these  
378 settings. Second, in ensuring the broad geographic distribution of ES sites at each study area,  
379 therefore capturing a wide range of microenvironments, we will be able to investigate how different  
380 ES site and catchment characteristics might correlate with the detection of *S. Typhi*. We also  
381 acknowledge that the proposed study may be affected by several limitations. First, upon the initial  
382 commencement of the study, the program of ES will be geographically restricted to two locations  
383 and temporally limited to just one year of active surveillance. Moreover, due to the ongoing global  
384 COVID-19 pandemic, we recognise that healthcare utilisation patterns within the study areas are  
385 likely to be impacted during the study period. Regarding the Vellore study location, due to the  
386 relatively coarse spatial resolution of the DEM used during the hydrological modelling process,

387 coupled with the high level of detail in the wastewater network, there is some uncertainty in the  
388 drainage catchments, and therefore population metric estimates, for the proposed ES site locations.  
389 However, we anticipate that the collection of ancillary data (such as local hydrologically) during the  
390 initial phase of the study, will allow us to refine the catchment modelling process and improve  
391 predictive accuracy of catchment wide population estimates. Finally, we recognise that despite  
392 significant advancements in molecular detection methods, there remain uncertainties regarding its  
393 sensitivity to detect *S. Typhi* in ES samples [26]. For example, molecular detection from complex  
394 environmental samples is often hampered by relatively low sensitivity and specificity [35] and  
395 therefore may yield false-negative results, thus prompting an underestimation of *S. Typhi* in the  
396 environmental samples [43].

397           Whilst active acute febrile illness surveillance with microbiological confirmation by culture  
398 remains the gold standard for estimation of the burden of typhoid fever in a community, such  
399 approaches are hugely time and resource demanding. Well designed and sensitive ES of *S. Typhi* may  
400 offer a practical and relatively low-cost alternative that could rapidly generate vital information  
401 regarding the prevalence of infection. This information could be used by national technical advisory  
402 groups and others to determine the likely benefits of TCV introduction and to monitor the impact of  
403 vaccination or WASH interventions to tackle typhoid fever.

## 404   **References**

- 405   1.     Stanaway JD, Reiner RC, Blacker BF, Goldberg EM, Khalil IA, Troeger CE, et al. The global  
406           burden of typhoid and paratyphoid fevers: a systematic analysis for the Global Burden of  
407           Disease Study 2017. *Lancet Infect Dis.* 2019;19: 369–381. doi:10.1016/S1473-3099(18)30685-  
408           6
- 409   2.     Appiah GD, Chung A, Bentsi-Enchill AD, Kim S, Crump JA, Mogasale V, et al. Typhoid  
410           outbreaks, 1989-2018: Implications for prevention and control. *Am J Trop Med Hyg.*  
411           2020;102: 1296–1305. doi:10.4269/ajtmh.19-0624
- 412   3.     Kim JH, Im J, Parajulee P, Holm M, Cruz Espinoza LM, Poudyal N, et al. A Systematic Review of  
413           Typhoid Fever Occurrence in Africa. *Clin Infect Dis.* 2019;69: S492-498.  
414           doi:10.1093/cid/ciz525
- 415   4.     Im J, Islam MT, Ahmmed F, Kim DR, Islam Khan A, Zaman K, et al. Can Existing Improvements  
416           of Water, Sanitation, and Hygiene (WASH) in Urban Slums Reduce the Burden of Typhoid  
417           Fever in These Settings? *Clin Infect Dis.* 2020. doi:10.1093/cid/ciaa1429
- 418   5.     Mirembe BB, Mazeri S, Callaby R, Nyakarahuka L, Kankya C, Muwonge A. Temporal, spatial  
419           and household dynamics of Typhoid fever in Kasese district, Uganda. *PLoS One.* 2019;14:  
420           e0214650. doi:10.1371/journal.pone.0214650
- 421   6.     Awol RN, Reda DY, Gidebo DD. Prevalence of *Salmonella enterica* serovar Typhi infection, its  
422           associated factors and antimicrobial susceptibility patterns among febrile patients at Adare  
423           general hospital, Hawassa, southern Ethiopia. *BMC Infect Dis.* 2021;21. doi:10.1186/s12879-  
424           020-05726-9
- 425   7.     Acosta-Alonzo CB, Erovenko I V., Lancaster A, Oh H, Rychtář J, Taylor D. High endemic levels  
426           of typhoid fever in rural areas of Ghana may stem from optimal voluntary vaccination  
427           behaviour. *Proc R Soc A Math Phys Eng Sci.* 2020;476. doi:10.1098/rspa.2020.0354

- 428 8. Marchello CS, Hong CY, Crump JA. Global typhoid fever incidence: A systematic review and  
429 meta-analysis. *Clin Infect Dis*. 2019;68: S105–S116. doi:10.1093/cid/ciy1094
- 430 9. Nair S, Chattaway M, Langridge GC, Gentle A, Day M, Ainsworth E V, et al. ESBL-producing  
431 strains isolated from imported cases of enteric fever in England and Wales reveal multiple  
432 chromosomal integrations of bla CTX-M-15 in XDR Salmonella Typhi . *J Antimicrob*  
433 *Chemother*. 2021 [cited 10 May 2021]. doi:10.1093/jac/dkab049
- 434 10. Antillon M, Saad NJ, Baker S, Pollard AJ, Pitzer VE. The Relationship between Blood Sample  
435 Volume and Diagnostic Sensitivity of Blood Culture for Typhoid and Paratyphoid Fever: A  
436 Systematic Review and Meta-Analysis. *J Infect Dis*. 2018;218: S255–S267.  
437 doi:10.1093/infdis/jiy471
- 438 11. Andualem G, Abebe T, Kebede N, Gebre-Selassie S, Mihret A, Alemayehu H. A comparative  
439 study of Widal test with blood culture in the diagnosis of typhoid fever in febrile patients.  
440 *BMC Res Notes*. 2014;7. doi:10.1186/1756-0500-7-653
- 441 12. Mengist HM, Tilahun K. Diagnostic Value of Widal Test in the Diagnosis of Typhoid Fever: A  
442 Systematic Review. *J Med Microbiol Diagnosis*. 2017;6. doi:10.4172/2161-0703.1000248
- 443 13. Mawazo A, Bwire GM, Matee MIN. Performance of Widal test and stool culture in the  
444 diagnosis of typhoid fever among suspected patients in Dar es Salaam, Tanzania. *BMC Res*  
445 *Notes*. 2019;12. doi:10.1186/s13104-019-4340-y
- 446 14. Mather RG, Hopkins H, Parry CM, Dittrich S. Redefining typhoid diagnosis: what would an  
447 improved test need to look like? *BMJ Glob Heal*. 2019;4: e001831. doi:10.1136/bmjgh-2019-  
448 001831
- 449 15. World Health Organisation. Weekly Epidemiological Record, 25 January 2019, vol. 94, 4 -  
450 Global Vaccine Safety meeting: Safety of typhoid conjugate vaccine. *Wkly Epidemiol Rec*.  
451 2019;94: 45–52.

- 452 16. Marchello CS, Carr SD, Crump JA. A Systematic Review on Antimicrobial Resistance among  
453 Salmonella Typhi Worldwide. *Am J Trop Med Hyg.* 2020;103: 2518–2527.  
454 doi:10.4269/ajtmh.20-0258
- 455 17. Hamisu AW, Blake IM, Sume G, Braka F, Jimoh A, Dahiru H, et al. Characterizing  
456 Environmental Surveillance Sites in Nigeria and Their Sensitivity to Detect Poliovirus and  
457 Other Enteroviruses. *J Infect Dis.* 2020. doi:10.1093/infdis/jiaa175
- 458 18. Jorgensen D, Pons-Salort M, Shaw AG, Grassly NC. The role of genetic sequencing and analysis  
459 in the polio eradication programme. *Virus Evol.* 2020;6. doi:10.1093/ve/veaa040
- 460 19. Bandyopadhyay AS, Macklin GR. Final frontiers of the polio eradication endgame. *Curr Opin*  
461 *Infect Dis.* 2020;33: 404–410. doi:10.1097/QCO.0000000000000667
- 462 20. Duff N, Steele AD, Garrett D. Global action for local impact: The 11th international conference  
463 on typhoid and other invasive salmonellosis. *Clin Infect Dis.* 2020;71: S59–S63.  
464 doi:10.1093/cid/ciaa236
- 465 21. Medema G, Been F, Heijnen L, Petterson S. Implementation of environmental surveillance for  
466 SARS-CoV-2 virus to support public health decisions: Opportunities and challenges. *Current*  
467 *Opinion in Environmental Science and Health.* Elsevier B.V.; 2020. pp. 49–71.  
468 doi:10.1016/j.coesh.2020.09.006
- 469 22. Saha S, Tanmoy AM, Andrews JR, Sajib MSI, Yu AT, Baker S, et al. Evaluating PCR-based  
470 detection of Salmonella typhi and paratyphi a in the environment as an enteric fever  
471 surveillance tool. *Am J Trop Med Hyg.* 2019;100: 43–46. doi:10.4269/ajtmh.18-0428
- 472 23. Karkey A, Jombart T, Walker AW, Thompson CN, Torres A, Dongol S, et al. The Ecological  
473 Dynamics of Fecal Contamination and Salmonella Typhi and Salmonella Paratyphi A in  
474 Municipal Kathmandu Drinking Water. *PLoS Negl Trop Dis.* 2016;10: e0004346.  
475 doi:10.1371/journal.pntd.0004346

- 476 24. Ali E, Van Den Bergh R, D'hondt R, Kuma-Kuma D, De Weggheleire A, Baudot Y, et al.  
477 Localised transmission hotspots of a typhoid fever outbreak in the Democratic Republic of  
478 Congo. *Pan Afr Med J.* 2017;28. doi:10.11604/pamj.2017.28.179.10208
- 479 25. Oguntoke O, Aboderin OJ, Bankole AM. Association of water-borne diseases morbidity  
480 pattern and water quality in parts of Ibadan City, Nigeria. *Tanzan J Health Res.* 2009;11: 189–  
481 195. doi:10.4314/thrb.v11i4.50174
- 482 26. Andrews JR, Yu AT, Saha S, Shakya J, Aiemjoy K, Horng L, et al. Environmental Surveillance as  
483 a Tool for Identifying High-risk Settings for Typhoid Transmission. *Clin Infect Dis.* 2020;71:  
484 S71–S78. doi:10.1093/cid/ciaa513
- 485 27. Hagedorn BL, Gauld J, Feasey N, Hu H. Cost-effectiveness of using environmental surveillance  
486 to target the roll-out typhoid conjugate vaccine. *Vaccine.* 2020;38: 1661–1670.  
487 doi:10.1016/j.vaccine.2019.12.061
- 488 28. Carey ME, MacWright WR, Im J, Meiring JE, Gibani MM, Park SE, et al. The surveillance for  
489 enteric fever in Asia project (SEAP), severe typhoid fever surveillance in Africa (SETA),  
490 surveillance of enteric fever in India (SEFI), and strategic typhoid alliance across Africa and  
491 Asia (STRATAA) population-based enteric fever studies: A review of methodological  
492 similarities and differences. *Clin Infect Dis.* 2020;71: S102–S110. doi:10.1093/cid/ciaa367
- 493 29. Phillips MT, Meiring JE, Voysey M, Warren JL, Baker S, Basnyat B, et al. A Bayesian approach  
494 for estimating typhoid fever incidence from large-scale facility-based passive surveillance  
495 data. *medRxiv.* 2020. doi:doi.org/10.1101/2020.10.05.20206938
- 496 30. Reich NG, Myers JA, Obeng D, Milstone AM, Perl TM. Empirical power and sample size  
497 calculations for cluster-randomized and cluster-randomized crossover studies. *PLoS One.*  
498 2012;7: e34464. doi:10.1371/journal.pone.0035564
- 499 31. Liu D, Zhong S, Huang Q. Study on risk assessment framework for snowmelt flood and hydro-



- 500 network extraction from watersheds. *Communications in Computer and Information Science*.  
501 2016. doi:10.1007/978-3-662-49155-3\_67
- 502 32. Fenta AA, Yasuda H, Shimizu K, Haregeweyn N, Woldearegay K. Quantitative analysis and  
503 implications of drainage morphometry of the Agula watershed in the semi-arid northern  
504 Ethiopia. *Appl Water Sci*. 2017;7: 3825–3840. doi:10.1007/s13201-017-0534-4
- 505 33. Stevens FR, Gaughan AE, Linard C, Tatem AJ. Disaggregating census data for population  
506 mapping using Random forests with remotely-sensed and ancillary data. *PLoS One*. 2015;10:  
507 e0107042. doi:10.1371/journal.pone.0107042
- 508 34. Facebook Connectivity Lab and Center for International Earth Science Information Network  
509 (CIESIN). High Resolution Settlement Layer (HRSL). University of Columbia: New York, NY,  
510 USA. Available online: <https://ciesin.columbia.edu/data/hrsl/>. Accessed 14 April 2020.
- 511 35. Sikorski MJ, Levine MM. Reviving the “Moore swab”: a classic environmental surveillance  
512 tool involving filtration of flowing surface water and sewage water to recover typhoidal  
513 *Salmonella* Bacteria. *Appl Environ Microbiol*. 2020;86: e00060-20. doi:10.1128/aem.00060-20
- 514 36. Pengbo Liu B, Ibaraki M, Kapoor R, Amin N, Das A, Rana Miah M, et al. Development of  
515 Moore Swab and Ultrafiltration Concentration and Detection Methods for *Salmonella* Typhi  
516 and *Salmonella* Paratyphi A in Wastewater and Application in Kolkata, India and Dhaka,  
517 Bangladesh. *medRxiv*. 2021; 2021.03.20.21254025. doi:10.1101/2021.03.20.21254025
- 518 37. Grimont PAD, Weill F-X. *Antigenic Formulae of the Salmonella Serovars*, Ninth Edition, World  
519 Health Organization Collaborating Centre for Reference and Research on *Salmonella*. Institut  
520 Pasteur, Paris, France 2007.
- 521 38. Nair S, Patel V, Hickey T, Maguire C, Greig DR, Lee W, et al. A real-time PCR for the  
522 differentiation of typhoidal and non-typhoidal *Salmonella*. *J Clin Microbiol*. 2019;57: e00167-  
523 19. doi:10.1128/JCM.00167-19

- 524 39. Nga TVT, Karkey A, Dongol S, Thuy HN, Dunstan S, Holt K, et al. The sensitivity of real-time  
525 PCR amplification targeting invasive Salmonella serovars in biological specimens. BMC Infect  
526 Dis. 2010;10. doi:10.1186/1471-2334-10-125
- 527 40. Ahmed W, Payyappat S, Cassidy M, Besley C. A duplex PCR assay for the simultaneous  
528 quantification of Bacteroides HF183 and crAssphage CPQ\_056 marker genes in untreated  
529 sewage and stormwater. Environ Int. 2019;126: 252–259. doi:10.1016/j.envint.2019.01.035
- 530 41. World Health Organisation. Meeting of the Strategic Advisory Group of Experts on  
531 Immunization, October 2017—conclusions and recommendations. Wkly Epidemiol Rec.  
532 2017;92: 729–747. Available: <https://pubmed.ncbi.nlm.nih.gov/29192459/>
- 533 42. Jo Y, Dowdy DW. The economic case for typhoid conjugate vaccines in countries with medium  
534 and high incidence of infection. Lancet Infect Dis. 2019;19: 675–676. doi:10.1016/S1473-  
535 3099(19)30054-4
- 536 43. Matrajt G, Lillis L, Meschke SJ. Review of methods suitable for environmental surveillance of  
537 salmonella typhi and paratyphi. Clin Infect Dis. 2020;71: S79–S83. doi:10.1093/cid/ciaa487

538

### 539 **Supporting information captions**

540 **S1 Table.** Full area and population statistics for environmental surveillance catchments in Blantyre  
541 and Vellore for full catchments and those overlapping the study area.

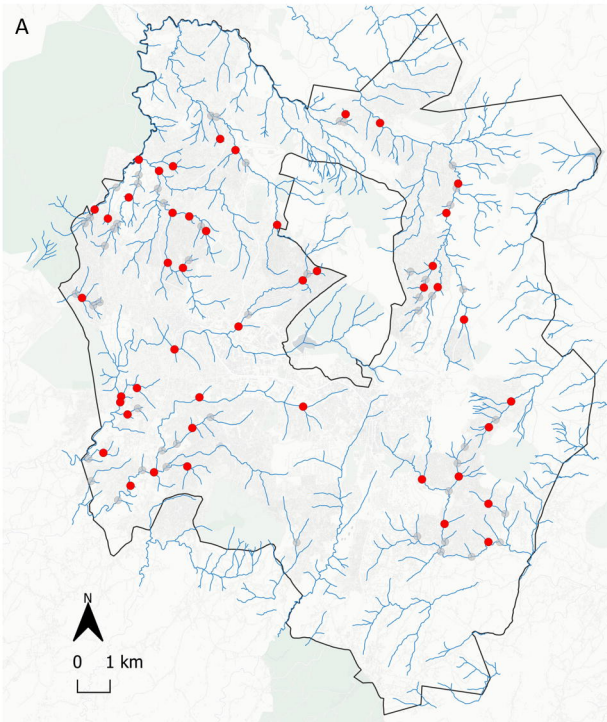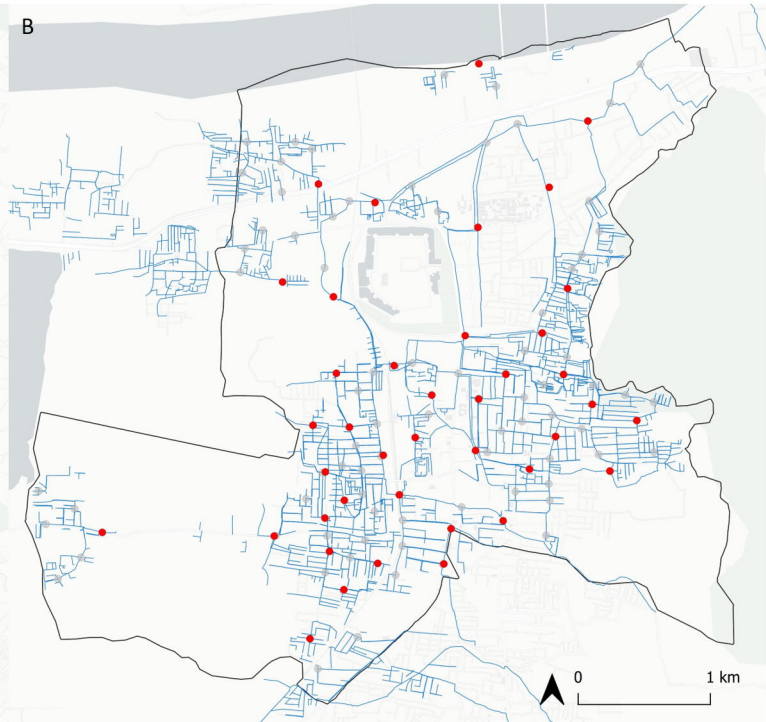

Source: https://www.medrxiv.org/content/10.1101/2021.05.21.21257547.full.pdf
